# Supplementary material
Source: publisher figshare collection journal article supplement (https://sage.figshare.com/ndownloader/files/16236290)
Supplement: Supplementary file 1 [file 16236290]

## Appendix A

| Plan Quality Evaluation Protocol        |                                                |                                                                                                                                                                                                |
|-----------------------------------------|------------------------------------------------|------------------------------------------------------------------------------------------------------------------------------------------------------------------------------------------------|
| Plan Quality Characteristic             | Indicator                                      | Description                                                                                                                                                                                    |
| Fact Base                               | Current Population                             | Description of the size of the current population – e.g., number of people and where currently located.                                                                                        |
|                                         | Future Population                              | Description of the size of the future population – e.g., number of people and where they will be located.                                                                                      |
|                                         | Current Population Composition                 | Description of the composition of the current population – e.g., age breakdown and gender.                                                                                                     |
|                                         | Future Population Composition                  | Description of the composition of the future population – e.g., age breakdown and gender.                                                                                                      |
|                                         | Current Economy                                | Description of the current economy of the municipality – e.g., main economic activities.                                                                                                       |
|                                         | Future Economy                                 | Description of the future economy of the municipality – e.g., continued support for existing economic activities.                                                                              |
|                                         | Existing Land Uses (or Land Use Map)           | Description of the existing land uses with accompanying land use map – e.g., residential, commercial, institutional, and parks and open space.                                                 |
|                                         | Current Land Supply for the Future             | Description of the current land supply for the future – e.g., the amount of developable land available.                                                                                        |
|                                         | Existing Community Facilities                  | Description of the existing community facilities – e.g., community centers, parks, trails and open spaces.                                                                                     |
|                                         | Future Need for Community Facilities           | Description of the future need for community facilities – e.g., community centers, parks and open spaces.                                                                                      |
|                                         | Existing Road Infrastructure                   | Description of the state of existing roads and other transportation infrastructure – e.g., roads, bike lanes and trails.                                                                       |
|                                         | Future Need for Road Infrastructure            | Description of the future need for roads and other transportation infrastructure – e.g., roads, bike lanes and trails.                                                                         |
|                                         | Existing Sewer and Water Infrastructure        | Description of the existing sewer and water infrastructure in the municipality.                                                                                                                |
|                                         | Future Need for Sewer and Water Infrastructure | Description of the future need for sewer and water infrastructure in the municipality.                                                                                                         |
|                                         | Air Quality                                    | Description regarding air quality (see PPS, 2005).                                                                                                                                             |
|                                         | Natural Heritage                               | Description regarding natural heritage (see PPS, 2005).                                                                                                                                        |
|                                         | Water Bodies                                   | Description regarding water bodies (see PPS, 2005).                                                                                                                                            |
|                                         | Constraints to Development                     | Description about constraints to development in the municipality.                                                                                                                              |
|                                         | Tables and Data Sources                        | At least one table and/or one figure to describe the fact base. Tables and/or figures should have appropriate titles and data sources.                                                         |
| Goals/Objectives (Used Interchangeably) | Land Use and Growth Management                 | At least one land use goal (or objective) included – e.g., focus on settlement (urban) areas, rural areas and rural land; can also include discussion about growth management (see PPS, 2005). |
|                                         | Housing                                        | At least one housing goal (or objective) included – e.g., focus on range and mix of housing types and densities (see PPS, 2005).                                                               |
|                                         | Transportation                                 | At least one transportation goal (or objective) included – e.g., movement of people and good, active transportation and transportation infrastructure (see PPS, 2005).                         |
|                                         | Waste Management                               | At least one waste management goal (or objective) included – e.g., recycling, solid waste disposal and transfer stations (see PPS, 2005).                                                      |
|                                         | Sewer and Wastewater                           | At least one sewer and wastewater goal (or objective) included – e.g., municipal sewage services and municipal water services (see PPS, 2005).                                                 |
|                                         | Energy Supply                                  | At least one energy supply goal (or objective) included – e.g., energy facilities and distribution (see PPS, 2005).                                                                            |
|                                         | Natural Heritage, Parks and Open Space         | At least one natural heritage and/or parks and open space goal (or objective) included – e.g., protection of natural areas and features (see PPS, 2005).                                       |
|                                         | Water (Drinking, Groundwater, Source Water)    | At least one water goal (or objective) included – e.g., protect and restore water quality and quantity (see PPS, 2005).                                                                        |
|                                         | Agriculture and Food                           | At least one agriculture and food goal (or objective) included – e.g., protect agricultural and specialty areas (see PPS, 2005).                                                               |
|                                         | Cultural Heritage                              | At least one cultural heritage goal (or objective) included – e.g., built heritage and cultural heritage landscapes (see PPS, 2005).                                                           |
|                                         | Mineral Aggregates                             | At least one mineral aggregate and resource extraction goal (or objective) included (if applicable) (see PPS, 2005).                                                                           |

|                                  |                                                  |                                                                                                                                                                                                                                                                                                                |
|----------------------------------|--------------------------------------------------|----------------------------------------------------------------------------------------------------------------------------------------------------------------------------------------------------------------------------------------------------------------------------------------------------------------|
|                                  | Natural and Human-Made Hazards                   | At least one natural and/or human-made hazard goal (or objective) included – e.g., hazardous lands and flood lines and former mineral aggregate operations (see PPS, 2005).                                                                                                                                    |
|                                  | Economic Development (includes Employment Lands) | At least one economic development goal (or objective) included – e.g., promote opportunities for economic development, tourism, support for local economy; can include goal/objective related to employment lands (area) (e.g., focus on range and mix of employment and employment areas) (see PPS, 2005).    |
| Policies                         | Land Use and Growth Management                   | At least one land use policy included – e.g., focus on settlement (urban) areas, rural areas and rural land; can also include discussion about growth management (see PPS, 2005).                                                                                                                              |
|                                  | Housing                                          | At least one housing policy included – e.g., focus on range and mix of housing types and densities (see PPS, 2005).                                                                                                                                                                                            |
|                                  | Transportation                                   | At least one transportation policy included – e.g., movement of people and good, active transportation and transportation infrastructure (see PPS, 2005).                                                                                                                                                      |
|                                  | Waste Management                                 | At least one waste management policy included – e.g., recycling, solid waste disposal and transfer stations (see PPS, 2005).                                                                                                                                                                                   |
|                                  | Sewer and Wastewater                             | At least one sewer and wastewater policy included – e.g., municipal sewage services and municipal water services (see PPS, 2005).                                                                                                                                                                              |
|                                  | Energy Supply                                    | At least one energy supply policy included – e.g., energy facilities and distribution (see PPS, 2005).                                                                                                                                                                                                         |
|                                  | Natural Heritage, Parks and Open Space           | At least one natural heritage and/or parks and open space policy included – e.g., protection of natural areas and features (see PPS, 2005).                                                                                                                                                                    |
|                                  | Water (Drinking, Groundwater, Source Water)      | At least one water policy included – e.g., protect and restore water quality and quantity (see PPS, 2005).                                                                                                                                                                                                     |
|                                  | Agriculture and Food                             | At least one agriculture and food policy included – e.g., protect agricultural and specialty areas (see PPS, 2005).                                                                                                                                                                                            |
|                                  | Cultural Heritage                                | At least one cultural heritage policy included – e.g., e.g., built heritage and cultural heritage landscapes (see PPS, 2005).                                                                                                                                                                                  |
|                                  | Mineral Aggregates                               | At least one mineral aggregate and resource extraction policy included (if applicable) (see PPS, 2005).                                                                                                                                                                                                        |
|                                  | Natural and Human-Made Hazards                   | At least one natural and/or human-made hazard policy included – e.g., hazardous lands and flood lines and former mineral aggregate operations (see PPS, 2005).                                                                                                                                                 |
|                                  | Economic Development (includes Employment Lands) | At least one economic development policy included – e.g., promote opportunities for economic development, tourism, support for local economy; can include policy related to employment lands (area) (e.g., focus on range and mix of employment and employment areas) (see PPS, 2005).                         |
| Implementation                   | Implementation Section                           | The plan includes a separate section that addresses what needs to be done to implement the plan.                                                                                                                                                                                                               |
|                                  | Plan Priority                                    | The plan prioritizes actions for implementation.                                                                                                                                                                                                                                                               |
|                                  | Organization Responsibility                      | The plan identifies specific organizations with responsibility for implementation.                                                                                                                                                                                                                             |
|                                  | Timelines                                        | The plan identifies timelines for implementation.                                                                                                                                                                                                                                                              |
| Monitoring and Evaluation        | Funding Sources                                  | The plan identifies sources of funding to implement the plan.                                                                                                                                                                                                                                                  |
|                                  | Monitoring and Evaluation Section                | The plan includes a separate section that addresses what needs to be done to monitor and evaluate the plan.                                                                                                                                                                                                    |
|                                  | Organization Responsibility                      | The plan identifies departments responsible for monitoring and evaluating the plan.                                                                                                                                                                                                                            |
|                                  | Timeline for Plan Update                         | The plan identifies a timetable for updating the plan based, in part, on results of monitoring changing conditions.                                                                                                                                                                                            |
|                                  | Indicators                                       | The plan identifies indicators for policies (or goals/objectives).                                                                                                                                                                                                                                             |
|                                  | Quantifiable Goals and Policies                  | The plan includes goals and policies that are quantifiable and based on measurable objectives and/or targets.                                                                                                                                                                                                  |
| Interorganizational Coordination | Horizontal Coordination                          | The plan includes at least one horizontal connection with other local plans/programs. This includes discussion of local governments and other public/private bodies (e.g., conservation authorities), where applicable. The plan makes reference to other agencies that might be involved plan implementation. |
|                                  | Vertical Coordination                            | The plan includes at least one vertical connection to provincial plans and regional plans, where applicable. The plan makes reference to other agencies that might be involved plan implementation.                                                                                                            |
| Public Participation             | Stakeholders                                     | The plan identifies the organizations and stakeholders involved in the plan making process – e.g., staff from different agencies or departments, citizen groups, politicians.                                                                                                                                  |
|                                  | Purpose of Participation                         | The plan includes an explanation of why organizations and stakeholders                                                                                                                                                                                                                                         |

|                               |                                                        |                                                                                                                                                                                                                                                                |
|-------------------------------|--------------------------------------------------------|----------------------------------------------------------------------------------------------------------------------------------------------------------------------------------------------------------------------------------------------------------------|
|                               | Public Participation Techniques<br>Effects on Citizens | were involved in the process.<br>The plan describes the techniques used to engage stakeholders – e.g., discussion groups, public meetings.<br>The plan includes a description of its evolution (can include effects on citizens and other stakeholder groups). |
| Organization and Presentation | Executive Summary                                      | The plan contains an executive summary or similar section that provides an overview/summary of the plan.                                                                                                                                                       |
|                               | Cross-Referencing                                      | The plan allows for cross-referencing that alerts readers to other sections of the plan that are relevant to the section being read.                                                                                                                           |
|                               | Table of Contents                                      | The plan includes a table of contents detailing plan chapters and subheadings.                                                                                                                                                                                 |
|                               | Glossary of Terms                                      | The plan includes a glossary or definition of terms.                                                                                                                                                                                                           |
|                               | Illustrations                                          | The plan uses clear illustrations to communicate contents – e.g., diagrams and graphs.                                                                                                                                                                         |
|                               | Maps                                                   | The plan communicates spatial information using maps and has accompanying textual description.                                                                                                                                                                 |
